# Supplementary material for: An S-scheme heterojunction constructed from α-Fe2O3 and In-doped carbon nitride for high-efficiency CO2 photoreduction
Source: Royal Society of Chemistry journal article supplement (doi:10.1039/d1cy02215f), 2022-01-01
Supplement: d1cy02215f1.pdf [file d1cy02215f1.pdf]

## Supplementary Material

### An S-scheme heterojunction constructed from $\alpha$ -Fe<sub>2</sub>O<sub>3</sub> and In-doped carbon nitride for high-efficiency CO<sub>2</sub> photoreduction

Jiaming Wu<sup>a</sup>, Keyan Li<sup>a,\*</sup>, Jiahui Li<sup>a</sup>, Jun Du<sup>a</sup>, Xiangyang Li<sup>a</sup>, Chunshan Song<sup>a,b</sup>,

Xinwen Guo<sup>a,\*</sup>

<sup>a</sup>State Key Laboratory of Fine Chemicals, PSU-DUT Joint Center for Energy

Research, School of Chemical Engineering, Dalian University of Technology, Dalian

116024, China.

<sup>b</sup>Department of Chemistry, Faculty of Science, The Chinese University of Hong Kong,

Shatin, Hong Kong 999077, China

\*Corresponding Author. E-mail address: keyanli@dlut.edu.cn; guoxw@dlut.edu.cn.

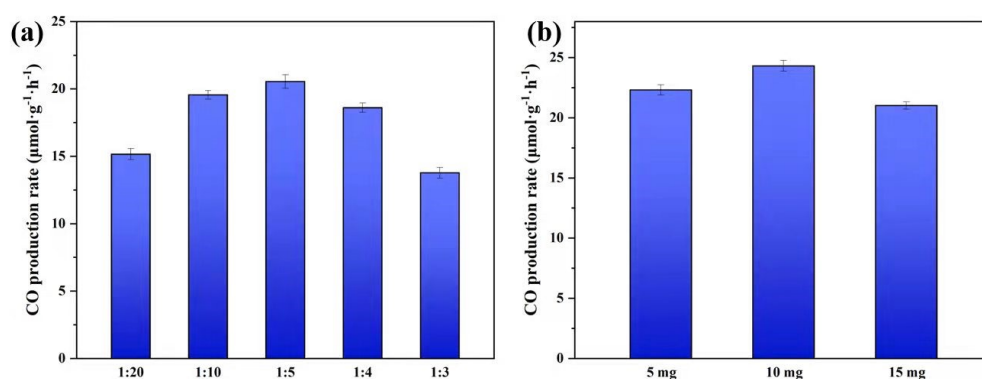

**Fig. S1** Photocatalytic CO<sub>2</sub> reduction activity of (a)  $\alpha$ -Fe<sub>2</sub>O<sub>3</sub>/PCN with different mass ratios of  $\alpha$ -Fe<sub>2</sub>O<sub>3</sub> to PCN and (b)  $\alpha$ -Fe<sub>2</sub>O<sub>3</sub>/In-CN for which In-CN are prepared with different dosages of In-MOF. The corresponding In contents are 0.24 wt%, 0.41 wt% and 0.70 wt%, respectively.

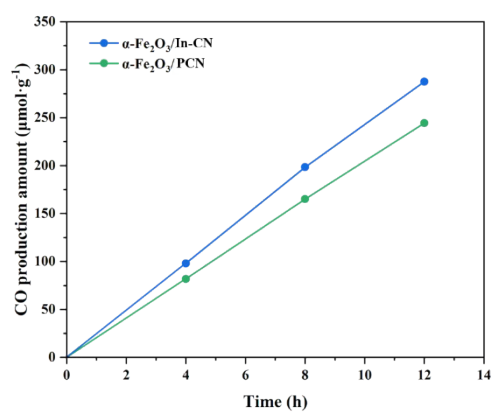

**Fig. S2** Time-dependent CO yield of  $\alpha$ -Fe<sub>2</sub>O<sub>3</sub>/PCN and  $\alpha$ -Fe<sub>2</sub>O<sub>3</sub>/In-CN heterojunctions.

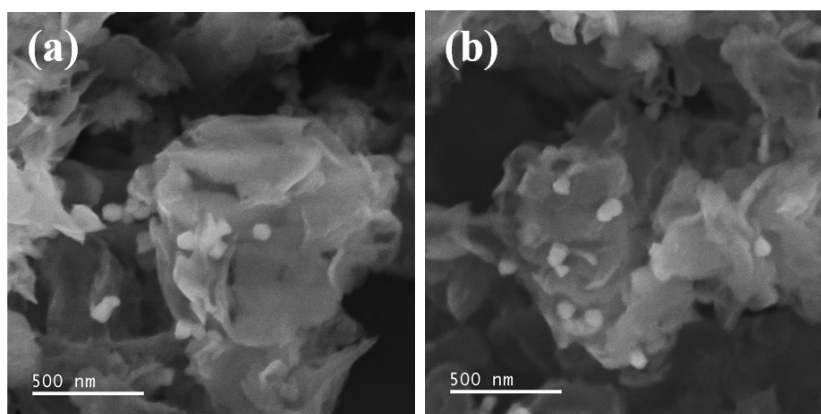

**Fig. S3** SEM images of  $\alpha$ -Fe<sub>2</sub>O<sub>3</sub>/In-CN (a) before reaction and (b) after continuous reaction for 12 h.

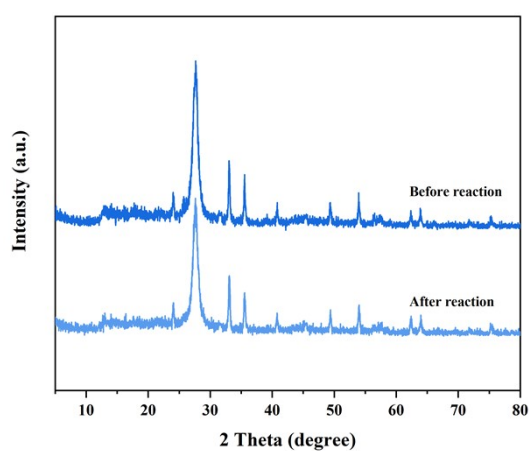

**Fig. S4** XRD patterns of  $\alpha$ -Fe<sub>2</sub>O<sub>3</sub>/In-CN before reaction and after continuous reaction for 12 h.

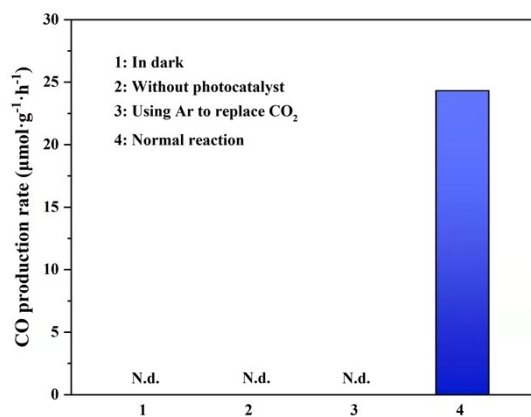

**Fig. S5** CO production rate over  $\alpha\text{-Fe}_2\text{O}_3/\text{In-CN}$  under various conditions (N.d.: not detected).

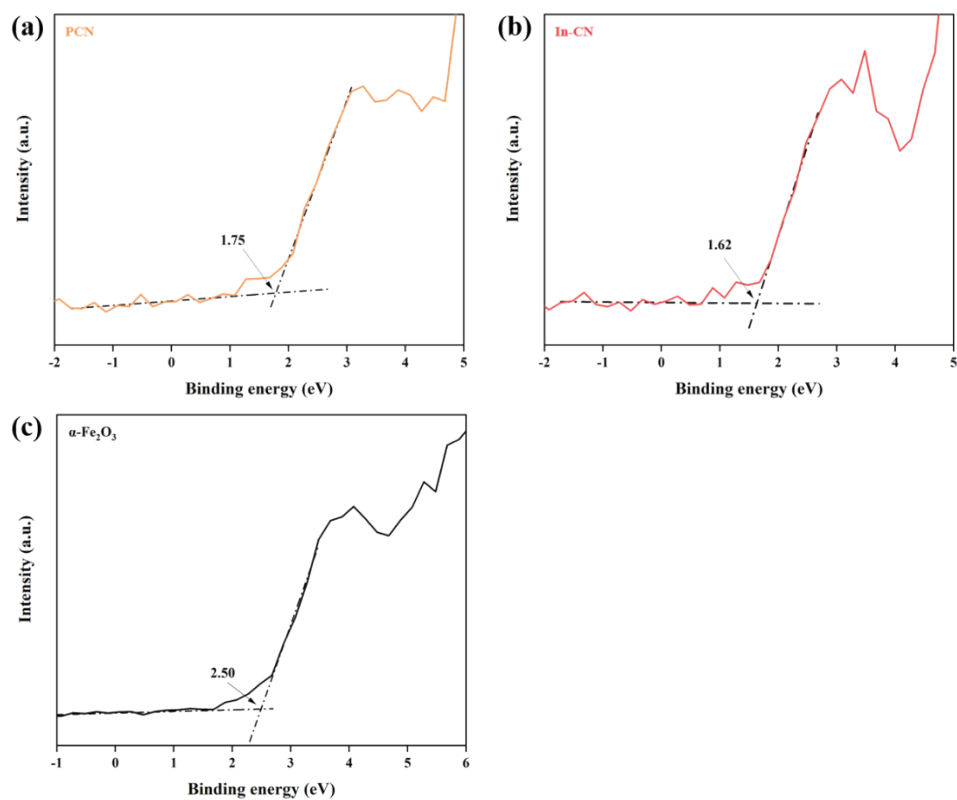

**Fig. S6** Valence band (VB)-XPS spectra of (a) PCN, (b) In-CN and (c)  $\alpha\text{-Fe}_2\text{O}_3$ .

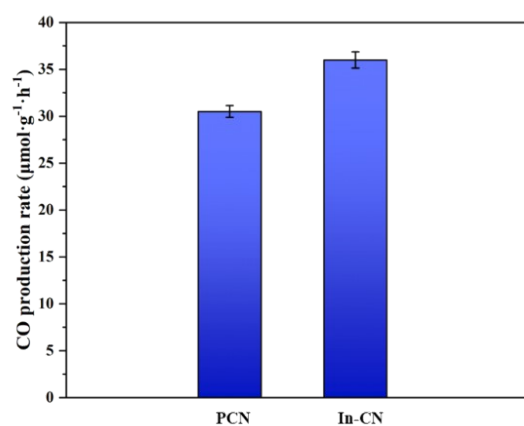

**Fig. S7** Comparison of the photocatalytic activity of PCN and In-CN in the presence of TEOA as hole sacrificial agent.

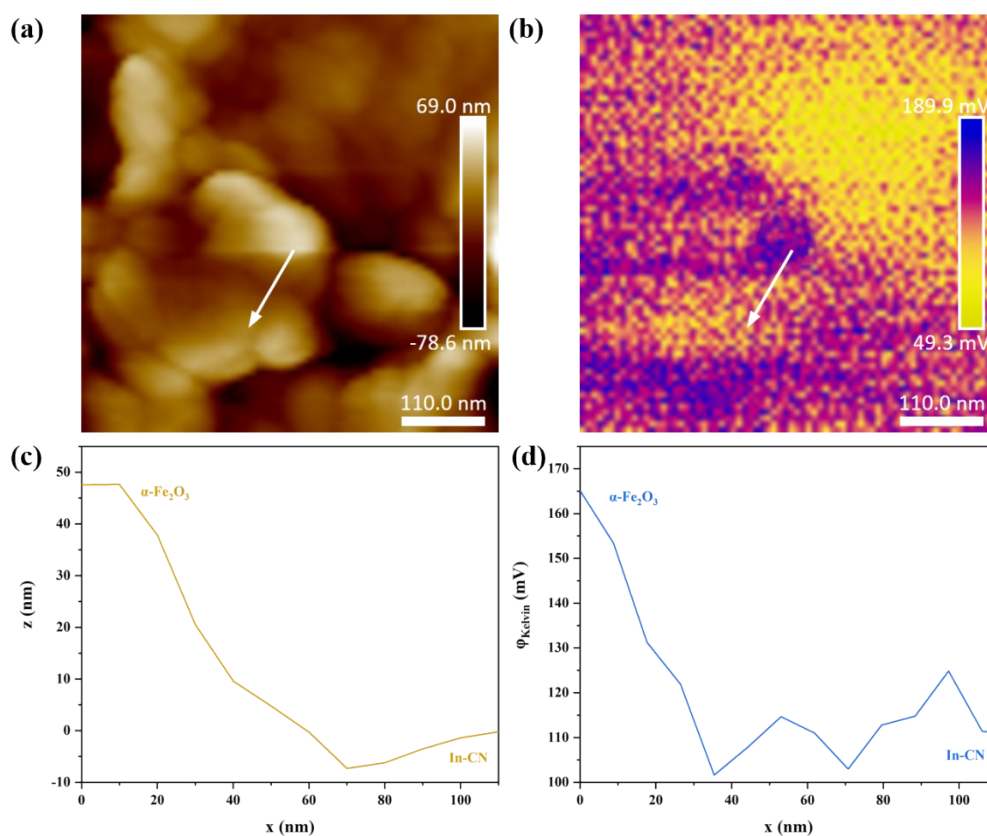

**Fig. S8** (a) Topography image and (b) surface potential of  $\alpha\text{-Fe}_2\text{O}_3/\text{In-CN}$ , (c,d) line-scanning profile and the corresponding Kelvin probe signal through one  $\alpha\text{-Fe}_2\text{O}_3$  nanoparticle.

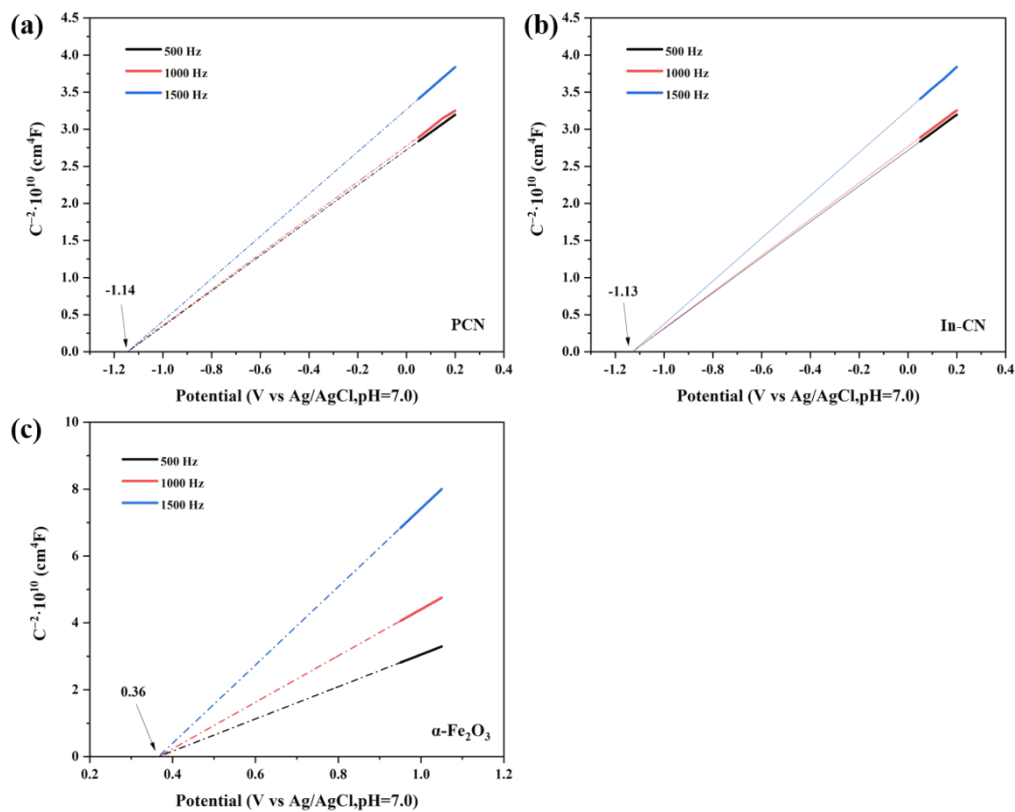

**Fig. S9** Mott-Schottky plots of (a) PCN, (b) In-CN and (c)  $\alpha$ -Fe<sub>2</sub>O<sub>3</sub>.

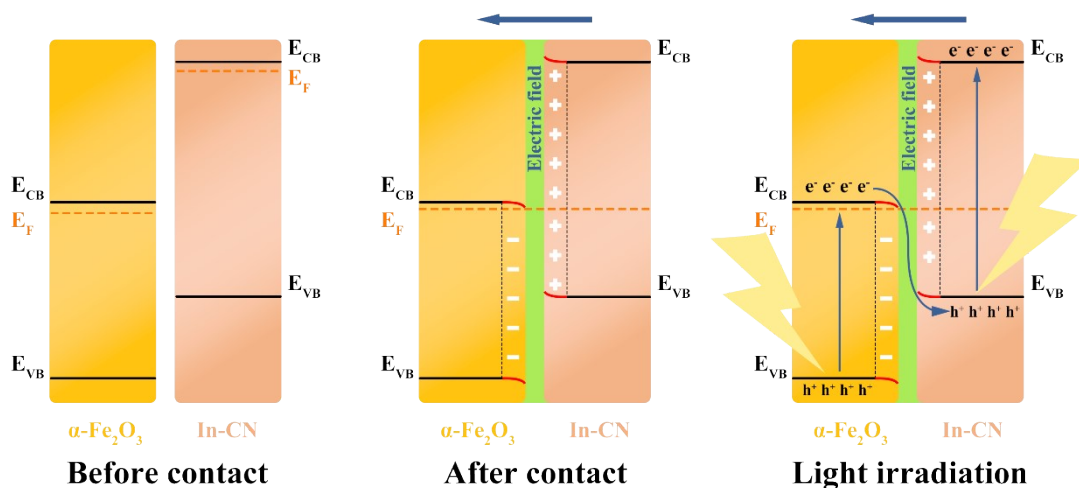

**Fig. S10** Energy band positions of  $\alpha$ -Fe<sub>2</sub>O<sub>3</sub> and In-CN (a) before contact, (b) after contact, and (c) S-scheme charge transfer mechanism under light irradiation.

**Table S1** Comparison of the CO<sub>2</sub> photoreduction performance of  $\alpha$ -Fe<sub>2</sub>O<sub>3</sub>/In-CN with those of other photocatalysts reported in the literature.

| Photocatalyst                                                                             | Light source                       | Reaction medium             | Product               | Product generation rate<br>( $\mu\text{mol}\cdot\text{g}^{-1}\cdot\text{h}^{-1}$ ) | Ref.      |
|-------------------------------------------------------------------------------------------|------------------------------------|-----------------------------|-----------------------|------------------------------------------------------------------------------------|-----------|
| $\alpha$ -Fe <sub>2</sub> O <sub>3</sub> /In-CN                                           | 300W Xe lamp                       | Gas-solid, H <sub>2</sub> O | CO                    | 24.3                                                                               | This work |
| MoS <sub>2</sub> /TiO <sub>2</sub>                                                        | 300W Xe lamp                       | Gas-solid, H <sub>2</sub> O | CO<br>CH <sub>4</sub> | 2.83<br>1.45                                                                       | [1]       |
| NH <sub>2</sub> -MIL-101(Fe)/g-C <sub>3</sub> N <sub>4</sub>                              | 300W Xe lamp<br>$\lambda > 400$ nm | Gas-solid, TEOA             | CO                    | 22.13                                                                              | [2]       |
| Bi <sub>3</sub> TiNbO <sub>9</sub>                                                        | 300W Xe lamp with AM1.5 G filter   | Gas-solid, H <sub>2</sub> O | CO                    | 20.91                                                                              | [3]       |
| Mo/C <sub>3</sub> N <sub>4</sub>                                                          | 300W Xe lamp<br>$\lambda > 420$ nm | Gas-solid, H <sub>2</sub> O | CO<br>H <sub>2</sub>  | 18.0<br>37.0                                                                       | [4]       |
| Urchin-like $\alpha$ -Fe <sub>2</sub> O <sub>3</sub> /g-C <sub>3</sub> N <sub>4</sub>     | 300W Xe lamp                       | Gas-solid, H <sub>2</sub> O | CO                    | 27.2                                                                               | [5]       |
| InVO <sub>4</sub> / $\beta$ -AgVO <sub>3</sub>                                            | 300W Xe lamp<br>$\lambda > 420$ nm | Gas-solid, H <sub>2</sub> O | CO                    | 12.61                                                                              | [6]       |
| ZnFe <sub>2</sub> O <sub>4</sub> /RGO/In <sub>2</sub> O <sub>3</sub>                      | 300W Xe lamp                       | Gas-solid, H <sub>2</sub> O | CO<br>CH <sub>4</sub> | 8.85<br>1.95                                                                       | [7]       |
| Co <sub>1</sub> -C <sub>3</sub> N <sub>4</sub> @ $\alpha$ -Fe <sub>2</sub> O <sub>3</sub> | 300W Xe lamp                       | Gas-solid, H <sub>2</sub> O | CO                    | 25.2                                                                               | [8]       |
| NiAl-LDH/Ti <sub>3</sub> C <sub>2</sub>                                                   | 300W Xe lamp                       | Gas-solid, H <sub>2</sub> O | CO                    | 11.82                                                                              | [9]       |
| LaPO <sub>4</sub> /g-C <sub>3</sub> N <sub>4</sub>                                        | 300W Xe lamp                       | Gas-solid, H <sub>2</sub> O | CO                    | 14.4                                                                               | [10]      |

**Table S2** The fitted parameters of time-resolved PL spectra.

| Sample                                          | $\tau_1$ (ns) | $f_1$ (%) | $\tau_2$ (ns) | $f_2$ (%) | $\tau$ (ns) |
|-------------------------------------------------|---------------|-----------|---------------|-----------|-------------|
| $\alpha$ -Fe <sub>2</sub> O <sub>3</sub> /In-CN | 3.87          | 72.35     | 16.50         | 27.65     | 11.69       |
| In-CN                                           | 4.03          | 81.13     | 17.44         | 19.77     | 10.76       |
| $\alpha$ -Fe <sub>2</sub> O <sub>3</sub> /PCN   | 2.05          | 82.35     | 8.50          | 17.65     | 5.09        |
| PCN                                             | 1.90          | 80.24     | 7.53          | 19.76     | 4.68        |

## References

- [1] Y. Li, J. Tang, Y. Wei, W. He, Z. Tang, X. Zhang, J. Xiong and Z. Zhao. *J. CO<sub>2</sub> Util.*, 2021, **51**, 101648.
- [2] X.-Y. Dao, X.-F. Xie, J.-H. Guo, X.-Y. Zhang, Y.-S. Kang and W.-Y. Sun. *ACS Appl. Energy Mater.*, 2020, **3**, 3946-3954.
- [3] H. Yu, F. Chen, X. Li, H. Huang, Q. Zhang, S. Su, K. Wang, E. Mao, B. Mei, G. Mul, T. Ma and Y. Zhang. *Nat. Commun.*, 2021, **12**, 4594.
- [4] R. Zhang, P. Li, F. Wang, L. Ye, A. Gaur, Z. Huang, Z. Zhao, Y. Bai and Y. Zhou. *Appl. Catal. B: Environ*, 2019, **250**, 273-279.
- [5] Z. Jiang, W. Wan, H. Li, S. Yuan, H. Zhao and P. K. Wong. *Adv. Mater.*, 2018, **30**, 1706108.
- [6] J. Yang, J. Hao, S. Xu, Q. Wang, J. Dai, A. Zhang and X. Pang. *ACS Appl. Mater. Inter.*, 2019, **11**, 32025-32037.
- [7] J. Li, F. Wei, C. Dong, W. Mu and X. Han. *J. Mater. Chem. A*, 2020, **8**, 6524-6531.
- [8] B.-C. He, C. Zhang, P.-P. Luo, Y. Li and T.-B. Lu. *Green Chem.*, 2020, **22**, 7552-7559.
- [9] Q. Shi, X. Zhang, Y. Yang, J. Huang, X. Fu, T. Wang, X. Liu, A. Sun, J. Ge, J. Shen, Y. Zhou and Z. Liu. *J. Energy Chem.*, 2021, **59**, 9-18.
- [10] M. Li, L. Zhang, X. Fan, M. Wu, M. Wang, R. Cheng, L. Zhang, H. Yao and J. Shi. *Appl. Catal. B: Environ*, 2017, **201**, 629-635.
